# Supplementary material
Source: publisher figshare collection journal article supplement (https://tandf.figshare.com/articles/dataset/_/4036779)
Supplement: Supplementary file 1 [file 1]

Supplementary table S2

List of Genbank accession numbers of viral strain sequences used in phylogenetic analyses

| Strain name | Segment A | Segment B |
| --- | --- | --- |
| 002-73 | X03993.1 | M19336 |
| 02015 | AJ879932.2 | AJ880090 |
| 100056 | KU234528 | KU234529 |
| 23/82 | AF362773 | AF362774 |
| 88180 | AM111353 | AM111354 |
| 89163 | HG974563 | HG974564 |
| BD3/99 | AF362776 | AF362770 |
| CA-D495 | JF907703 | JF907704 |
| CA-K785 | JF907702 | JF907705 |
| CEF94 | AF194428 | AF194429 |
| CHINJU | AF508176.1 | *Not available* |
| CT | AJ310185 | AJ310186.1 |
| CU-1 | X16107 | AF362775 |
| Cu-1M | AF362771.1 | AF362772 |
| CU1-WT | AF362747 | AF362748 |
| D69/48 | AF240686 | AF240687 |
| F52/70 | HG974565 | HG974566 |
| Gep 5 | AF443294.1 | *Not available* |
| GX | AY444873 | AY705393 |
| GX-NN-L | JX134485 | JX134486 |
| Harbin-1 | F517528 | EF517529 |
| HK46 | AF092943 | AF092944 |
| HLJ-0504 | GQ451330 | GQ451331 |
| HN04 | KC109816 | KC109815 |
| HZ2 | AF321054.1 | AF493979 |
| IM | AY029166.1 | AY029165 |
| Jasper | NC_001915 | NC_001916.1 |
| JD1 | AF321055.1 | AY103464 |
| KT1/99 | AJ427340.1 | *Not available* |
| KZC-104 | AB368968 | AB368969 |
| OH | U30818 | U30819 |
| OKYM | D49706 | D49707 |
| P2 | X84034 | X84035 |
| P3009 | AF109154.1 | *Not available* |
| PBG-98 | D00868.1 | *Not available* |
| SH95 | AY134874 | AY134875 |
| STC | D00499.1 | *Not available* |
| TL2004 | DQ088175 | DQ118374 |
| UK661 | X92760 | AJ318897 |
| UPM97/61 | AF247006.1 | AF527040 |
| VarGLS | AY368653 | AY368654 |
| Variant E | AF133904 | AF133905 |
| ZJ2000 | AF321056.1 | DQ166818 |
| IL3 | *Not available* | AF083093 |
| IL4 | *Not available* | AF083094 |
| Taxon1 | *Not available* | L19502 |
| Ts | *Not available* | AF203880 |
| Winterfield | *Not available* | AF083092.1 |
